# Supplementary material for: Antimicrobial Activity from Putative Probiotic Lactic Acid Bacteria for the Biological Control of American and European Foulbrood Diseases
Source: MDPI journal article supplement (doi:10.3390/vetsci9050236), 2022-05-12
Supplement: s1 [file s1]

**Table S4.** Carbohydrate assimilation profiles of the selected *Lactiplantibacillus plantarum* and *Apilactobacillus kunkeei* strains using API 50 CHL test kit (+ positive; – negative).

| Carbohydrate               | <i>Lp. plantarum</i> strains |       |        |        | <i>Al. kunkeei</i> strains |         |         |         |
|----------------------------|------------------------------|-------|--------|--------|----------------------------|---------|---------|---------|
|                            | LP 31                        | LP 42 | LP 148 | LP 179 | ALK 181                    | ALK 222 | ALK 268 | ALK 385 |
| Glycerol                   | -                            | -     | -      | -      | -                          | -       | -       | -       |
| Erythriol                  | -                            | -     | -      | -      | -                          | -       | -       | -       |
| D-Arabinose                | -                            | -     | -      | -      | -                          | -       | -       | -       |
| L-Arabinose                | +                            | +     | +      | +      | +                          | +       | +       | +       |
| Ribose                     | +                            | +     | +      | +      | +                          | +       | +       | +       |
| D-Xylose                   | -                            | -     | -      | -      | -                          | -       | -       | -       |
| L-Xylose                   | +                            | -     | -      | -      | -                          | -       | -       | -       |
| Adonitol                   | -                            | -     | -      | -      | -                          | -       | -       | -       |
| Methyl-β-D-Xylopyranoside  | -                            | -     | -      | -      | -                          | -       | -       | -       |
| Galactose                  | +                            | +     | +      | +      | +                          | +       | +       | +       |
| Glucose                    | +                            | +     | +      | +      | +                          | +       | +       | +       |
| Fructose                   | +                            | +     | +      | +      | +                          | +       | +       | +       |
| Mannose                    | +                            | +     | +      | +      | +                          | +       | +       | +       |
| Sorbose                    | +                            | +     | +      | +      | -                          | -       | -       | -       |
| Rhamnose                   | -                            | -     | -      | +      | -                          | -       | +       | -       |
| Dulcitol                   | -                            | -     | -      | -      | -                          | -       | -       | -       |
| Inositol                   | -                            | -     | -      | -      | -                          | -       | -       | -       |
| Mannitol                   | +                            | +     | +      | +      | +                          | +       | +       | +       |
| Sorbitol                   | +                            | +     | +      | +      | +                          | +       | +       | +       |
| Methyl-α-D-Mannopyranoside | +                            | +     | +      | +      | -                          | -       | -       | -       |
| Methyl-α-D-Glucopyranoside | +                            | +     | +      | +      | -                          | -       | -       | -       |
| N-Acetylglucosamine        | +                            | +     | +      | +      | +                          | +       | +       | +       |
| Amygdalin                  | +                            | +     | +      | +      | +                          | +       | +       | +       |
| Arbutin                    | +                            | +     | +      | +      | +                          | +       | +       | +       |
| Esculin                    | +                            | +     | +      | +      | +                          | +       | +       | +       |
| Salicin                    | +                            | +     | +      | +      | +                          | +       | +       | +       |
| Cellobiose                 | +                            | +     | +      | +      | +                          | +       | +       | +       |
| Maltose                    | +                            | +     | +      | +      | +                          | +       | +       | +       |
| Lactose                    | +                            | +     | +      | +      | +                          | +       | +       | +       |
| Melibiose                  | +                            | +     | +      | +      | +                          | +       | +       | +       |
| Sucrose                    | +                            | +     | +      | +      | +                          | +       | +       | +       |
| Trehalose                  | +                            | +     | +      | +      | +                          | +       | +       | +       |
| Inulin                     | -                            | -     | -      | -      | -                          | -       | -       | -       |
| Melezitose                 | +                            | +     | +      | +      | +                          | +       | +       | +       |
| Raffinose                  | +                            | +     | +      | +      | -                          | -       | -       | -       |
| Starch                     | -                            | -     | -      | -      | -                          | -       | -       | -       |
| Glycogen                   | -                            | -     | -      | -      | -                          | -       | -       | -       |
| Xylitol                    | -                            | -     | -      | -      | -                          | -       | -       | -       |
| Gentiobiose                | +                            | +     | -      | -      | +                          | +       | +       | +       |
| Turanose                   | -                            | +     | +      | -      | +                          | +       | +       | +       |
| Lyxose                     | -                            | -     | -      | -      | -                          | -       | -       | -       |
| Tagatose                   | -                            | -     | -      | -      | -                          | -       | -       | -       |
| D-Fucose                   | -                            | -     | -      | -      | -                          | -       | -       | -       |
| L-Fucose                   | -                            | -     | -      | -      | -                          | -       | -       | -       |
| D-Arabitol                 | -                            | -     | -      | -      | -                          | -       | -       | -       |
| L-Arabitol                 | -                            | -     | -      | -      | -                          | -       | -       | -       |
| Gluconate                  | +                            | -     | -      | +      | -                          | -       | -       | -       |
| 2-keto-gluconate           | -                            | -     | -      | -      | -                          | -       | -       | -       |
| 5-keto-gluconate           | -                            | -     | -      | -      | +                          | +       | +       | +       |
