# Supplementary material for: Antimicrobial Activity from Putative Probiotic Lactic Acid Bacteria for the Biological Control of American and European Foulbrood Diseases
Source: MDPI journal article supplement (doi:10.3390/vetsci9050236), 2022-05-12
Supplement: s1 [file s1]

**Table S1.** Screening of antimicrobial activity of the sixty-five LAB strains performed by spot agar assay.

| CFS                                         | <i>P. larvae</i> | <i>M. plutonius</i> | CFS                                             | <i>P. larvae</i> | <i>M. plutonius</i> |
|---------------------------------------------|------------------|---------------------|-------------------------------------------------|------------------|---------------------|
| <i>Apilactobacillus kukeii</i> 196          | 1.10±0.10        | 0.66±0.05           | <i>Fructobacillus ficulneus</i> 453             | 1.16±0.15        | 0.33±0.05           |
| <i>Apilactobacillus kukeii</i> 198          | 2.03±0.15        | 1.06±0.22           | <i>Fructobacillus fructosus</i> 267             | 0.26±0.05        | 0.96±0.11           |
| <i>Apilactobacillus kukeii</i> 210          | 0.70±0.11        | 1.33±0.15           | <i>Fructobacillus fructosus</i> 294             | 0.56±0.11        | 1.51±0.23           |
| <i>Apilactobacillus kunkeei</i> 129         | 3.00±0.17        | 1.96±0.12           | <i>Fructobacillus fructosus</i> 295             | 1.03±0.15        | 1.56±0.11           |
| <i>Apilactobacillus kunkeei</i> 15          | 3.23±0.15        | 1.63±0.11           | <i>Fructobacillus fructosus</i> 352             | 0.82±0.10        | 2.73±0.15           |
| <i>Apilactobacillus kunkeei</i> 172         | 2.21±0.24        | 2.16±0.26           | <i>Fructobacillus fructosus</i> 353             | 1.93±0.11        | 1.86±0.15           |
| <i>Apilactobacillus kunkeei</i> 174         | 2.1±0.12         | 1.14±0.14           | <i>Fructobacillus fructosus</i> 360             | 2.94±0.14        | 2.56±0.11           |
| <i>Apilactobacillus kunkeei</i> 176         | 1.64±0.22        | 3.16±0.27           | <i>Fructobacillus pseudoficulneus</i> 455       | 0.83±0.05        | 1.43±0.15           |
| <i>Apilactobacillus kunkeei</i> 177         | 0.54±0.13        | 2.86±0.15           | <i>Lactiplantibacillus plantarum</i> 108        | 1.46±0.15        | 0.83±0.05           |
| <i>Apilactobacillus kunkeei</i> 180         | 3.33±0.25        | 1.89±0.17           | <i>Lactiplantibacillus plantarum</i> 110        | 2.74±0.17        | 1.86±0.15           |
| <i>Apilactobacillus kunkeei</i> 193         | 1.46±0.25        | 2.66±0.15           | <i>Lactiplantibacillus plantarum</i> 122        | 3.16±0.15        | 2.36±0.15           |
| <i>Apilactobacillus kunkeei</i> 251         | 2.76±0.11        | 1.31±0.12           | <i>Lactiplantibacillus plantarum</i> 129        | 3.16±0.26        | 1.26±0.05           |
| <i>Apilactobacillus kunkeei</i> 26          | 1.25±0.17        | 1.26±0.15           | <i>Lactiplantibacillus plantarum</i> 130        | 2.53±0.15        | 2.46±0.15           |
| <i>Apilactobacillus kunkeei</i> 298         | 0.56±0.15        | 1.25±0.17           | <i>Lactiplantibacillus plantarum</i> 131        | 1.43±0.22        | 2.96±0.25           |
| <i>Apilactobacillus kunkeei</i> 299         | 3.43±0.42        | 2.06±0.11           | <i>Lactiplantibacillus plantarum</i> 257        | 2.53±0.40        | 1.41±0.17           |
| <i>Apilactobacillus kunkeei</i> 30          | 2.76±0.15        | 2.56±0.05           | <i>Lactiplantibacillus plantarum</i> 3          | 0.96±0.15        | 2.43±0.32           |
| <i>Apilactobacillus kunkeei</i> 300         | 1.40±0.20        | 3.03±0.15           | <i>Lactiplantibacillus plantarum</i> 53         | 1.82±0.17        | 3.28±0.26           |
| <i>Apilactobacillus kunkeei</i> 314         | 3.03±0.15        | 1.96±0.15           | <i>Lactiplantibacillus plantarum</i> 82         | 0.97±0.14        | 2.76±0.22           |
| <i>Apilactobacillus kunkeei</i> 32          | 0.36±0.11        | 2.76±0.25           | <i>Lactiplantibacillus plantarum</i> 83         | 2.46±0.22        | 2.23±0.25           |
| <i>Apilactobacillus kunkeei</i> 328         | 0.16±0.05        | 2.90±0.13           | <i>Lactiplantibacillus plantarum</i> 84         | 1.53±0.20        | 1.19±0.17           |
| <i>Apilactobacillus kunkeei</i> 338         | 2.06±0.25        | 1.23±0.15           | <i>Lactiplantibacillus plantarum</i> 86         | 1.06±0.15        | 0.33±0.05           |
| <i>Apilactobacillus kunkeei</i> 467         | 0.97±0.11        | 1.36±0.11           | <i>Lactiplantibacillus plantarum</i> 92         | 2.16±0.14        | 0.66±0.15           |
| <i>Apilactobacillus kunkeei</i> 78          | 1.53±0.35        | 2.92±0.26           | <i>Lactiplantibacillus plantarum</i> ATCC 14917 | 1.16±0.15        | 1.83±0.11           |
| <i>Apilactobacillus kunkeei</i> 99          | 1.23±0.05        | 2.26±0.21           | <i>Lactiplantibacillus plantarum</i> LP100      | 2.13±0.15        | 0.56±0.15           |
| <i>Apilactobacillus kunkeei</i> ALK181      | 5.83±0.36        | 6.72±0.25           | <i>Lactiplantibacillus plantarum</i> LP148      | 7.96±0.25        | 6.93±0.32           |
| <i>Apilactobacillus kunkeei</i> ALK222      | 6.00±0.35        | 5.63±0.22           | <i>Lactiplantibacillus plantarum</i> LP179      | 5.91±0.36        | 5.51±0.37           |
| <i>Apilactobacillus kunkeei</i> ALK268      | 5.13±0.23        | 6.16±0.21           | <i>Lactiplantibacillus plantarum</i> LP212      | 2.40±0.25        | 1.16±0.15           |
| <i>Apilactobacillus kunkeei</i> ALK385      | 6.43±0.35        | 5.63±0.32           | <i>Lactiplantibacillus plantarum</i> LP25       | 0.86±0.05        | 0.53±0.05           |
| <i>Apilactobacillus kunkeei</i> ATCC 700308 | 1.03±0.15        | 1.46±0.11           | <i>Lactiplantibacillus plantarum</i> LP31       | 7.46±0.25        | 5.96±0.25           |
| <i>Enterococcus faecalis</i> 145            | 0.67±0.14        | 1.36±0.15           | <i>Lactiplantibacillus plantarum</i> LP42       | 8.12±0.37        | 4.93±0.32           |
| <i>Enterococcus faecalis</i> 146            | 1.31±0.22        | 2.3±0.09            | <i>Lactiplantibacillus plantarum</i> LP8        | 1.33±0.15        | 2.00±0.34           |
| <i>Enterococcus faecalis</i> 390            | 2.13±0.15        | 3.26±0.34           | <i>Lactiplantibacillus plantarum</i> LP86       | 2.63±0.37        | 1.10±0.17           |
|                                             |                  |                     | <i>Lactiplantibacillus plantarum</i> LP95       | 1.83±0.15        | 2.56±0.15           |
