# Supplementary material for: Antimicrobial Activity from Putative Probiotic Lactic Acid Bacteria for the Biological Control of American and European Foulbrood Diseases
Source: MDPI journal article supplement (doi:10.3390/vetsci9050236), 2022-05-12
Supplement: s1 [file s1]

**Table S2.** Composition of API 50 medium.

|                                  |                                    |         |
|----------------------------------|------------------------------------|---------|
| API 50 CHL Medium<br>composition | Polpeptone (bovine/porcine origin) | 10 g    |
|                                  | Yeast extract                      | 5 g     |
|                                  | Tween 80                           | 1 mL    |
|                                  | Dipotassium phosphate              | 2 g     |
|                                  | Sodium acetate                     | 5 g     |
|                                  | Diammonium citrate                 | 2 g     |
|                                  | Magnesium sulfate                  | 0.20 g  |
|                                  | Manganese sulfate                  | 0.05 g  |
|                                  | Bromcresol purple                  | 0.17 g  |
|                                  | Demineralized water                | 1000 mL |
|                                  | pH: 6.7-7.1                        |         |
