# Supplementary material for: Antimicrobial Activity from Putative Probiotic Lactic Acid Bacteria for the Biological Control of American and European Foulbrood Diseases
Source: MDPI journal article supplement (doi:10.3390/vetsci9050236), 2022-05-12
Supplement: s1 [file s1]

**Table S5.** Enzymatic profiles of the 8 tested LAB strains using the API-ZYM system (+ positive; - negative).

| Enzyme                          | <i>Lp. plantarum</i> strains |       |        |        | <i>Al. kumkei</i> strains |         |         |         |
|---------------------------------|------------------------------|-------|--------|--------|---------------------------|---------|---------|---------|
|                                 | LP 31                        | LP 42 | LP 148 | LP 179 | ALK 181                   | ALK 222 | ALK 268 | ALK 385 |
| Acid phosphatase                | -                            | -     | -      | -      | +                         | +       | +       | +       |
| Alkaline phosphatase            | -                            | +     | +      | +      | +                         | +       | +       | +       |
| Cystine arylamidase             | -                            | -     | -      | -      | +                         | +       | +       | +       |
| Esterase (C4)                   | -                            | +     | +      | +      | +                         | +       | +       | +       |
| Esterase lipase (C8)            | +                            | -     | +      | -      | +                         | +       | +       | +       |
| Leucine arylamidase             | +                            | -     | +      | -      | +                         | +       | +       | +       |
| Lipase (C14)                    | -                            | -     | -      | -      | -                         | -       | -       | -       |
| N-acetyl-b-glucosaminidase      | +                            | +     | +      | +      | +                         | +       | +       | +       |
| Naphthol-AS-BI-phosphohydrolase | -                            | -     | -      | -      | +                         | +       | +       | +       |
| Trypsin                         | -                            | -     | -      | -      | -                         | -       | -       | -       |
| Valine arylamidase              | +                            | -     | +      | -      | +                         | +       | +       | +       |
| $\alpha$ -Chymotrypsin          | -                            | -     | -      | -      | -                         | -       | -       | -       |
| $\alpha$ -Fucosidase            | -                            | -     | -      | -      | +                         | +       | +       | +       |
| $\alpha$ -Galactosidase         | -                            | +     | +      | +      | -                         | +       | -       | -       |
| $\alpha$ -Glucosidase           | +                            | +     | +      | +      | +                         | +       | +       | +       |
| $\alpha$ -Mannosidase           | -                            | -     | -      | -      | -                         | -       | -       | -       |
| $\beta$ -Galactosidase          | +                            | +     | +      | +      | +                         | +       | +       | +       |
| $\beta$ -Glucosidase            | +                            | +     | +      | +      | +                         | +       | -       | +       |
| $\beta$ -Glucuronidase          | -                            | -     | -      | -      | -                         | +       | -       | +       |
